# Supplementary material for: Interfacial engineering of quantum dot-sensitized TiO2 fibrous electrodes for futuristic photoanodes in photovoltaic applications
Source: Royal Society of Chemistry journal article supplement (doi:10.1039/c2jm31599h), 2012-01-01
Supplement: c2jm31599h.pdf [file c2jm31599h.pdf]

## Supporting information

# Interfacial Engineering of Quantum Dot-Sensitized TiO<sub>2</sub> Fibrous Electrodes for Futuristic Photoanodes in Photovoltaic Applications

*P. Sudhagar,<sup>a</sup> Victoria Gonzalez-Pedro, Iván Mora-Seró,<sup>b\*</sup> Francisco Fabregat Santiago, Juan Bisquert,<sup>b</sup> and Yong Soo Kang<sup>a\*</sup>*

\*Corresponding authors:

Yong Soo Kang : ([kangys@hanyang.ac.kr](mailto:kangys@hanyang.ac.kr)); and Ivan Mora-Sero ([sero@fca.uji.es](mailto:sero@fca.uji.es))

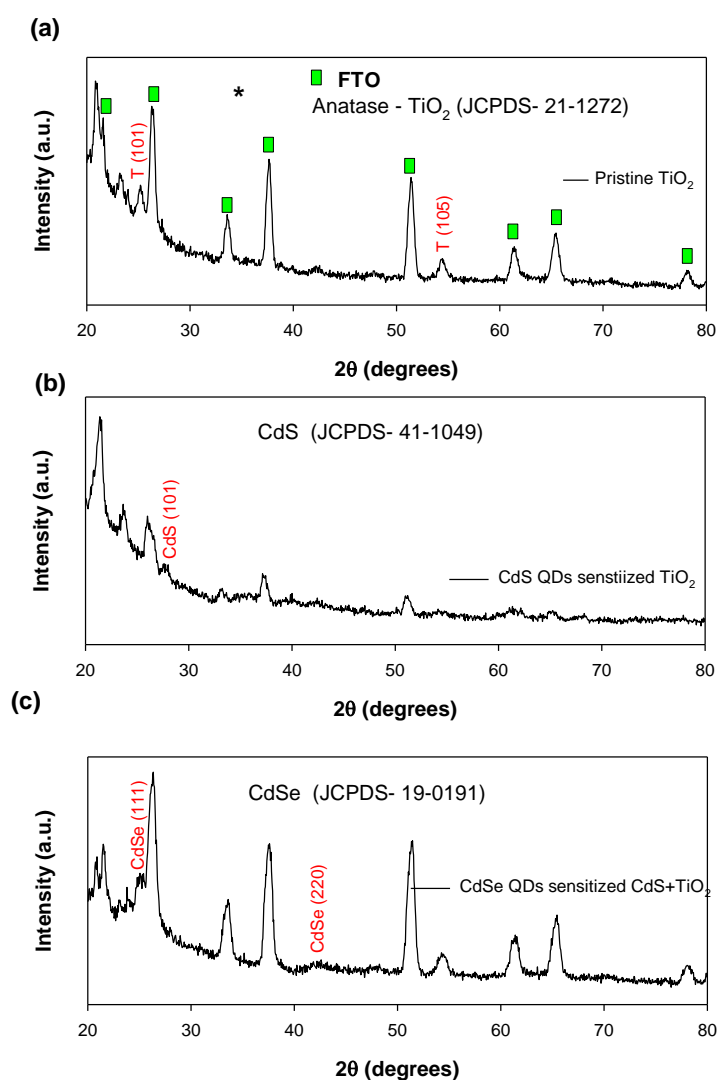

**Fig. S1.** XRD patterns of the (a) untreated TiO<sub>2</sub> fibrous electrodes. QDs sensitized TiO<sub>2</sub> fibrous electrodes using (b) CdS QDs and (c) CdSe QDs on CdS/TiO<sub>2</sub> (fibrous electrodes are untreated).

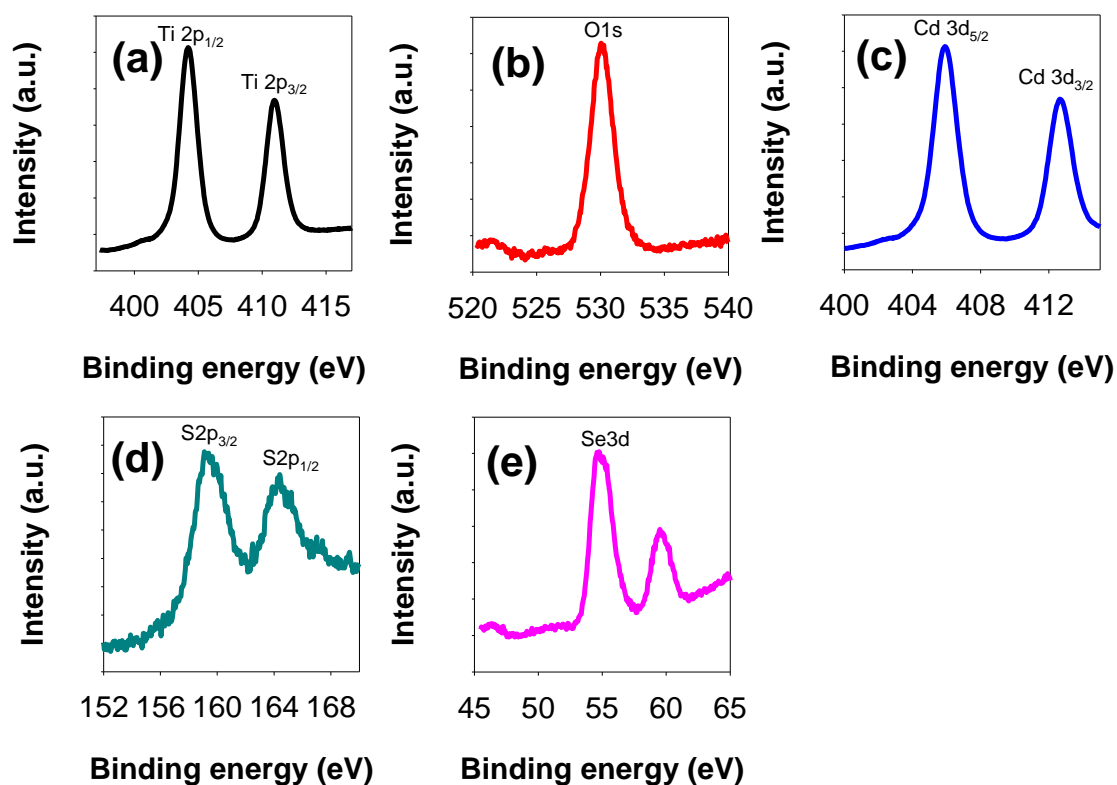

**Fig S2.** XPS spectra of CdSe/CdS QDs sensitized TiO<sub>2</sub> fibrous electrode (a) Ti 2p (b) O 1s (c) Cd 2p (d) S 1s and (e) Se 1s region.
